# Supplementary material
Source: PubMed Central journal article supplement (PMC4577424)
Supplement: supp_pp.15.00888_00888revSupplemental_data.pdf [file supp_pp.15.00888_00888revSupplemental_data.pdf]

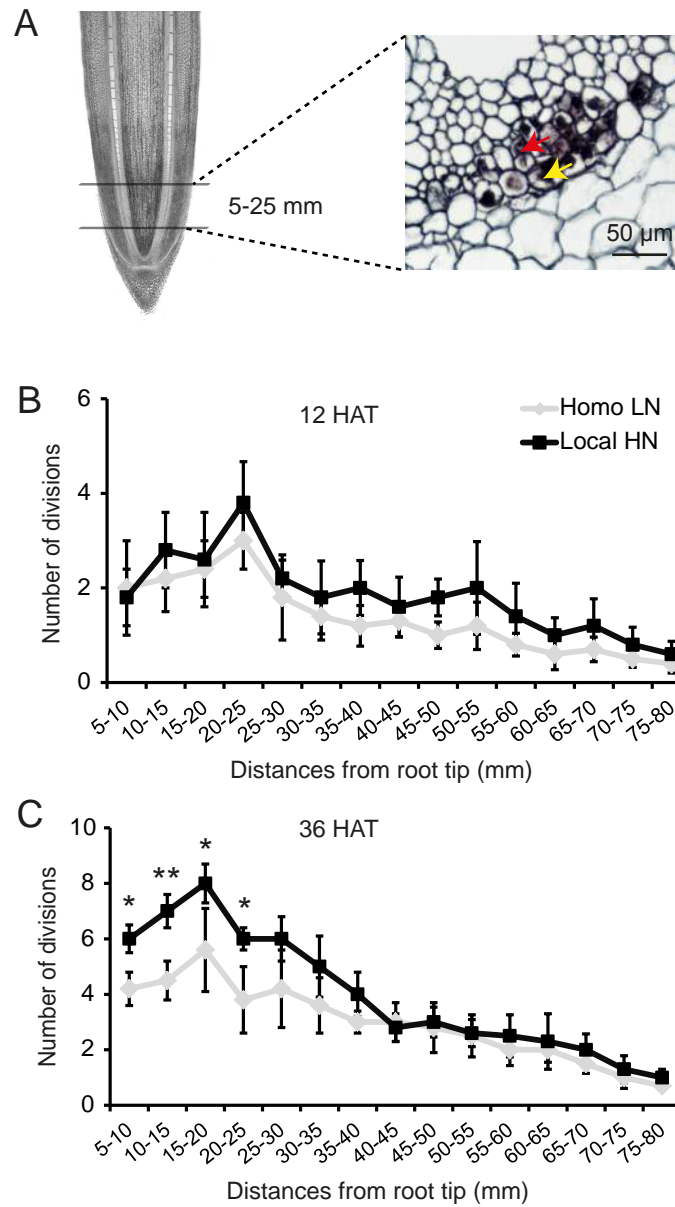

**Supplemental Figure 1.** Early pericycle cell divisions in shoot-borne roots. (A) Longitudinal section of a shoot-borne root and the first anticlinal divisions of pericycle (red arrows) and endodermis cells (yellow arrows). In the region 5-25 mm proximal of the root tip, peak differences of early pericycle cell divisions (see Figure 1D) were monitored between homogeneous low nitrate (homo LN) and local high nitrate (local HN) treatments. Scale bar: 50  $\mu$ m. Early pericycle cell divisions in shoot-borne roots 12 (B) and 36 (C) hours after local high nitrate treatment (HAT). Error bars represent SE for four biological replicates. Asterisks denote a significant difference according to paired Student's *t* test (\*:  $p \leq 0.05$ ; \*\*:  $p \leq 0.01$ ). Homogeneous low nitrate: homo LN; local high nitrate: local HN.

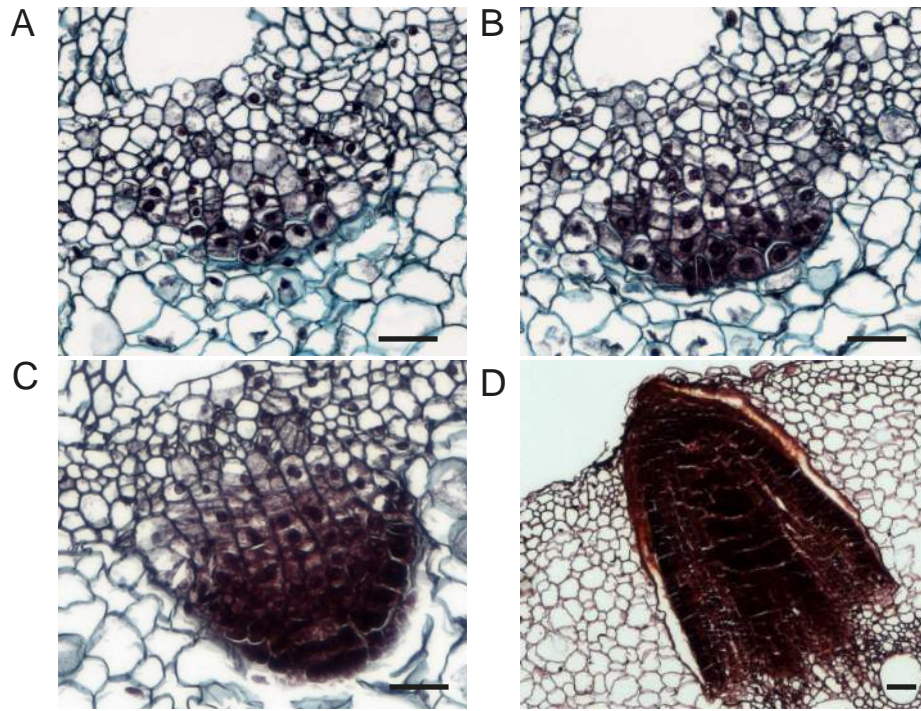

**Supplemental Figure 2.** Different stages of lateral root primordium formation are illustrated by representative images: (A) I-III, (B) IV-V, (C) VI-VII, (D) VIII. Scale bar: 50  $\mu\text{m}$ .

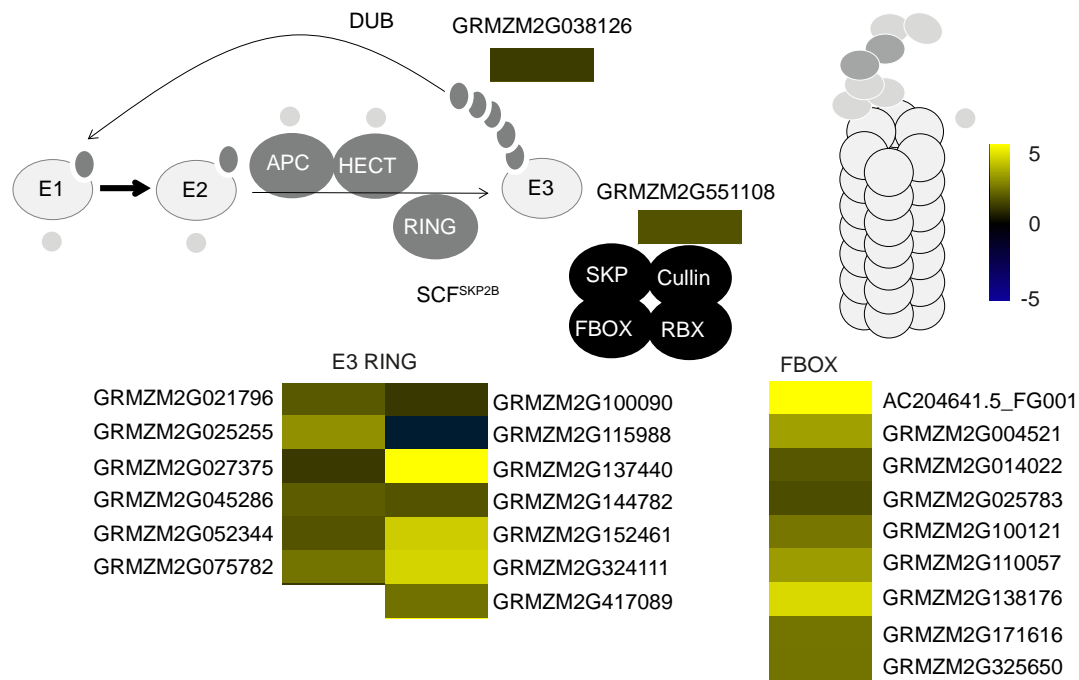

**Supplemental Figure 3.** Schematic overview of the components of the ubiquitin-dependent degradation system ( $SCF^{SKP2B}$  complex) induced in response to local high nitrate.  $\log_2$ -fold changes of gene expression (local HN versus homo LN) are illustrated by MapMan. DUB, deubiquitinating enzyme; E1, ubiquitin-activating enzymes; E2, Ubiquitin-conjugating enzymes; RING, C3HC4 RING-domain-containing ubiquitin E3 ligase; HECT, HECT type E3; APC, anaphase-promoting complex; E3, Ubiquitin ligases; Cullin, SKP, FBOX and RBX, subunit of the E3 ligase. Homogeneous low nitrate: homo LN; local high nitrate: local HN.

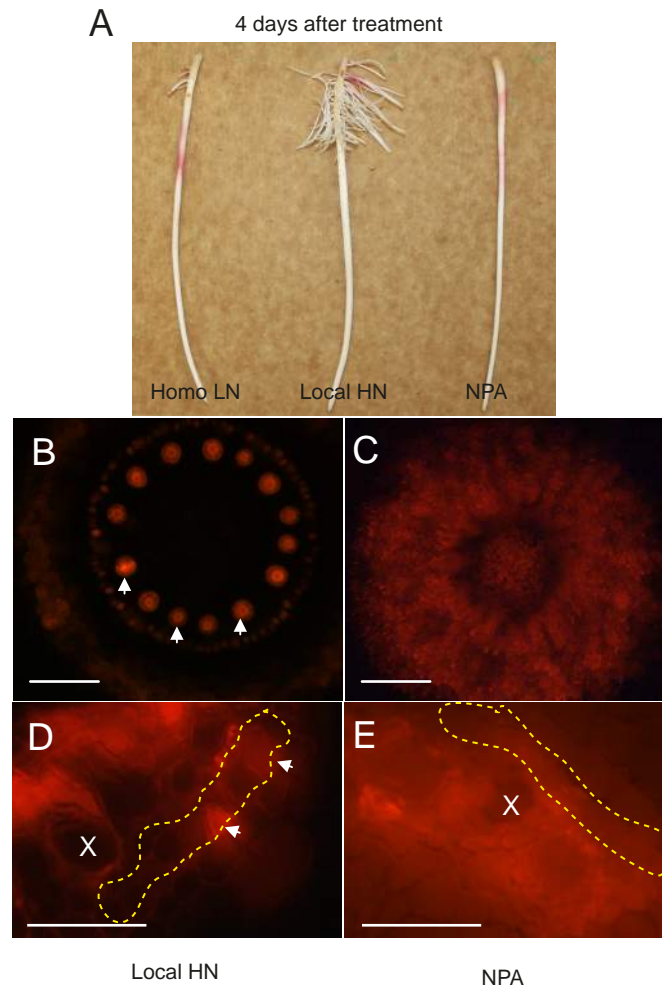

**Supplemental Figure 4.** Inhibition of lateral root formation and auxin response by NPA treatment. (A) Shoot-borne roots grown in homogeneous low nitrate, local high nitrate and NPA solution for 4 days. Comparison of vascular differentiation and auxin response between local high nitrate (B) and NPA (C) treatment. White arrows indicate auxin signal in the late meta-xylem. Auxin maxima signal in dividing pericycle cells (D) and those after NPA treatment (E). Yellow dotted boxes indicate the pericycle cell layer. X represents a xylem cell. Scale bar = 150  $\mu\text{m}$  (B, C), 50  $\mu\text{m}$  (D, E). Homogeneous low nitrate: homo LN; local high nitrate: local HN.

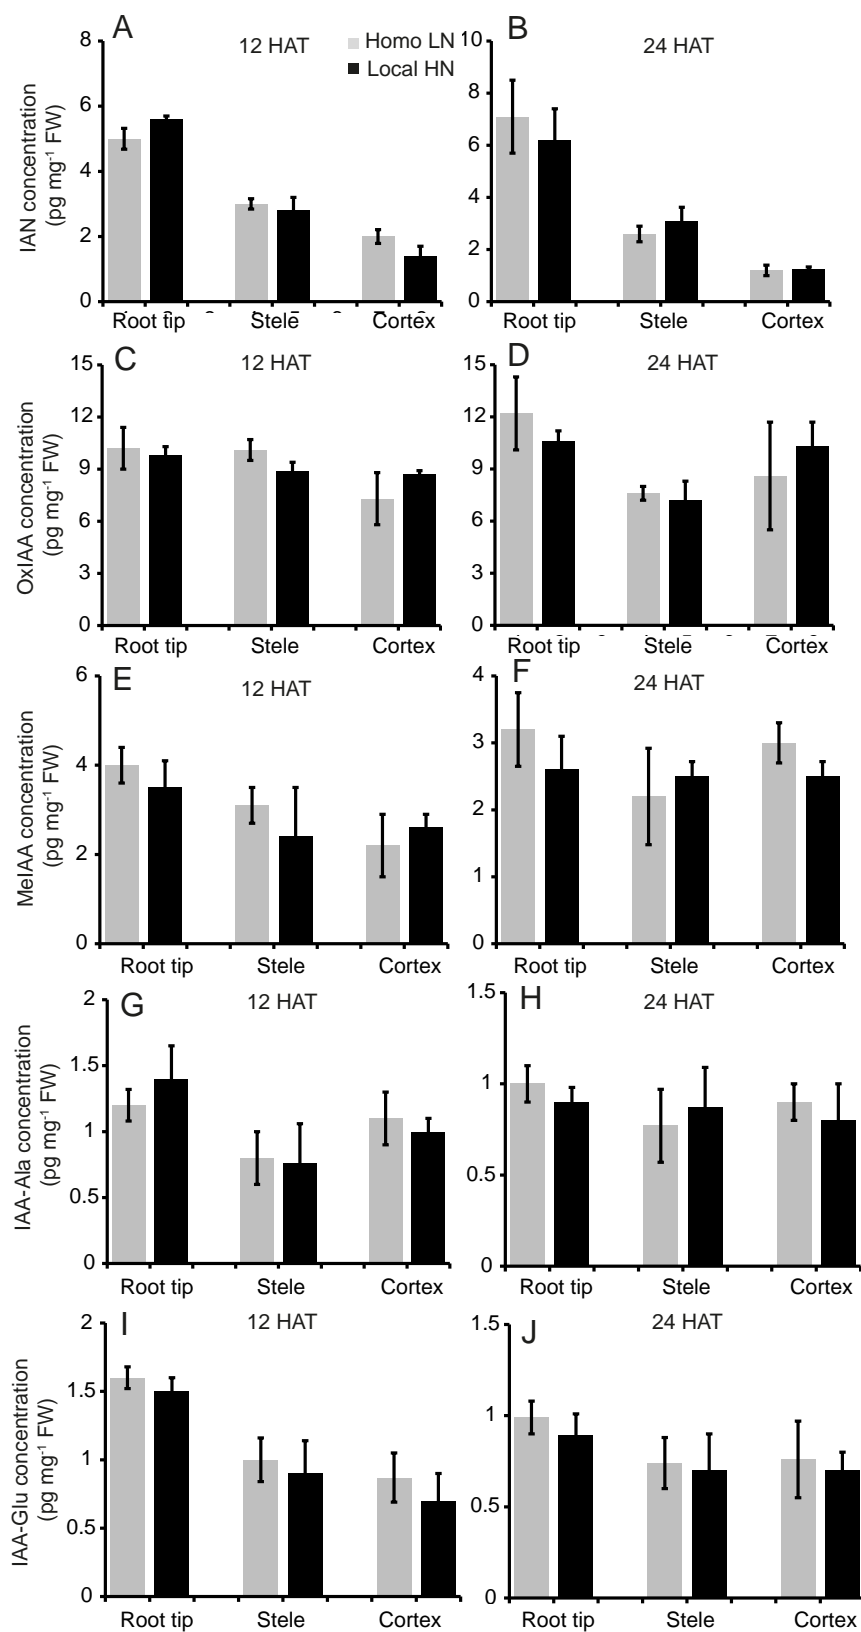

**Supplemental Figure 5.** MeIAA (A, B), IAN (C, D), OxIAA (E, F), IAA-Ala (G, H), IAA-Glu (I, J) concentrations in root tip, stele and cortex of shoot-borne roots induced by homogeneous low and local high nitrate 12 hours after treatment (HAT) and 24 HAT. Error bars represent SE for four biological replicates.

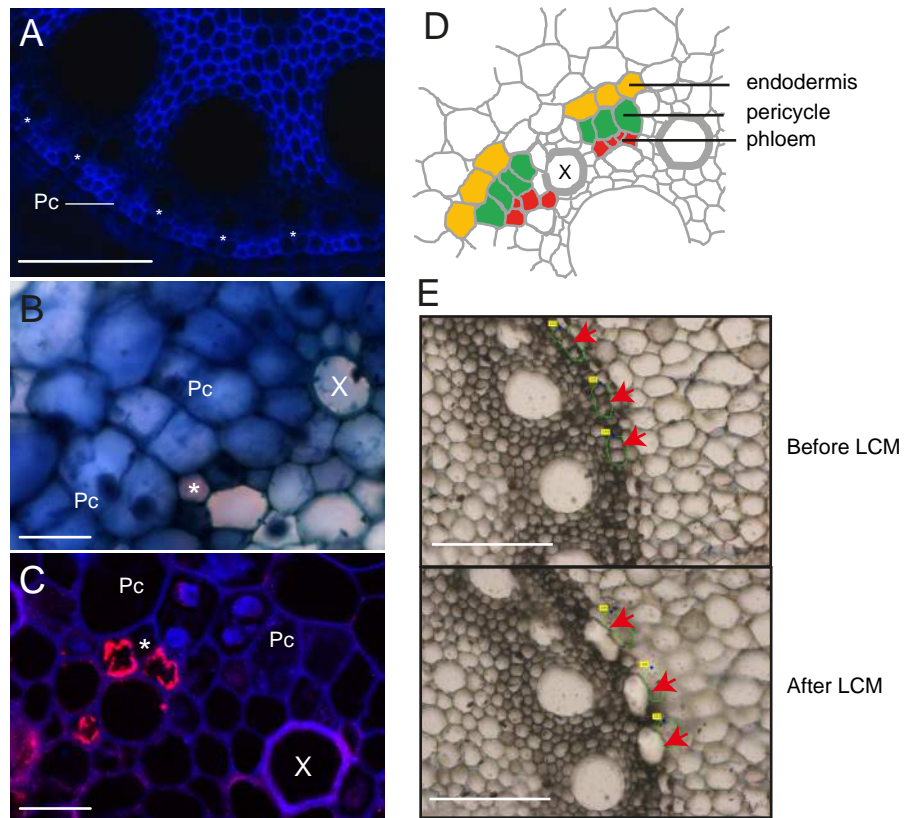

**Supplemental Figure 6.** Pericycle cells dividing at the phloem poles and illustration of LCM-microdissected cell types. Heterogeneous arrangements of pericycle cells alternated by phloem and xylem poles are shown by autofluorescence (A). (B) Lateral roots originating from early divisions of competent pericycle cells at the phloem poles illustrated by toluidine blue staining. (C) Auxin maxima and pericycle cell divisions are highlighted by DR5::RFP fluorescence and DAPI counterstaining. Pc: pericycle cell; asterisk: phloem, X: xylem cell. Scale bars: 150  $\mu\text{m}$  (A), 20  $\mu\text{m}$  (B, C). (D) Color-coded scheme of three cell types (endodermis, pericycle and phloem) isolated by LCM. X: meta-xylem vessel. (E) As an example micrographs taken before and after capturing pericycle cells are shown (red arrows).

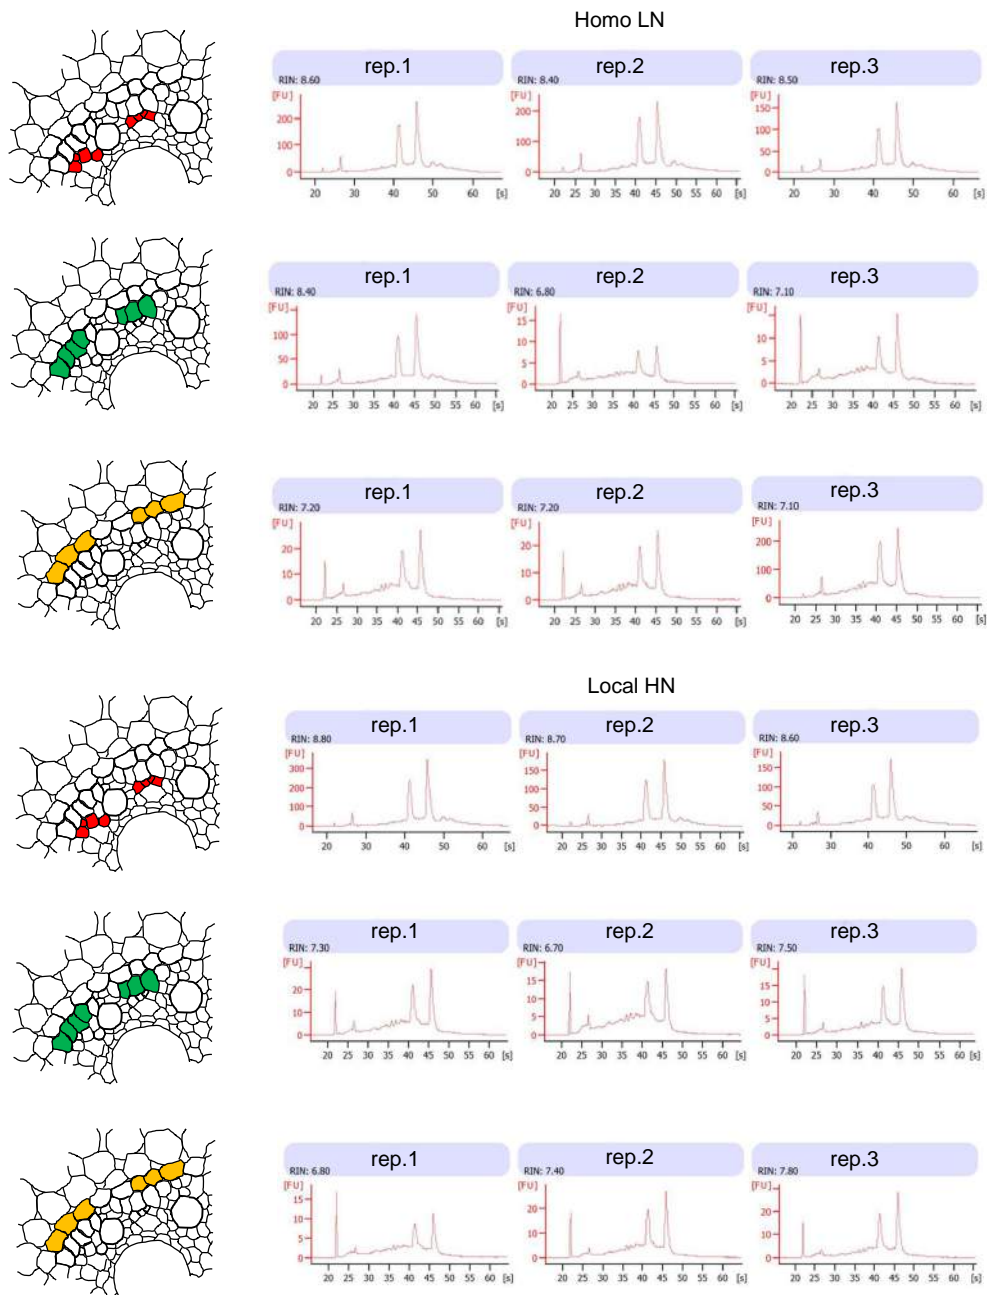

**Supplemental Figure 7.** RNA quality of LCM-dissected cell types evaluated by the RNA integrity number (RIN). Color codes indicate phloem (red), pericycle (green), and endodermis (yellow) cells. Homogeneous low nitrate: homo LN; local high nitrate: local HN.

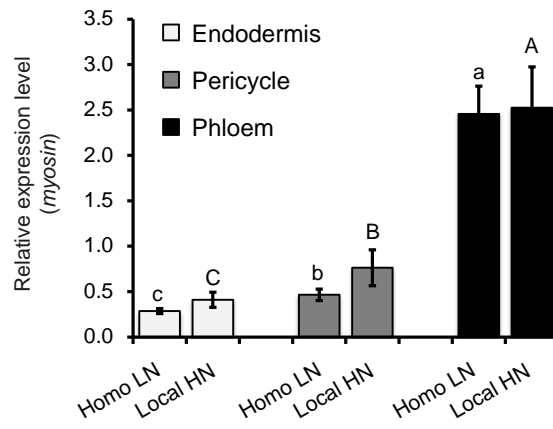

**Supplemental Figure 8.** Relative expression level of *ZmPIN1c* in three cell-types related to lateral root initiation. Different letters indicate significant differences among means when given a single homogeneous low nitrate (lower case letters) or local high nitrate (capital letters) treatment ( $p \leq 0.05$  by one-way ANOVA analysis). Homogeneous low nitrate: homo LN; local high nitrate: local HN.



**Supplemental Table 1.** Comprehensively enriched GO terms obtained by singular enrichment analyses among differentially expressed genes in pair-wise comparisons between local high nitrate and homogeneous low nitrate treatments. <sup>a</sup>

| GO term    | Ontology | Description                                             | Number in input list | Number in BG/Ref |
|------------|----------|---------------------------------------------------------|----------------------|------------------|
| GO:0006979 | P        | response to oxidative stress                            | 37                   | 227              |
| GO:0042221 | P        | response to chemical stimulus                           | 41                   | 432              |
| GO:0050896 | P        | response to stimulus                                    | 81                   | 2128             |
| GO:0006950 | P        | response to stress                                      | 74                   | 1883             |
| GO:0007050 | P        | cell cycle arrest                                       | 5                    | 7                |
| GO:0022402 | P        | cell cycle process                                      | 6                    | 27               |
| GO:0007049 | P        | cell cycle                                              | 6                    | 35               |
| GO:0016684 | F        | oxidoreductase activity, acting on peroxide as acceptor | 38                   | 243              |
| GO:0004601 | F        | peroxidase activity                                     | 38                   | 243              |
| GO:0016209 | F        | antioxidant activity                                    | 38                   | 257              |
| GO:0005506 | F        | iron ion binding                                        | 53                   | 858              |
| GO:0020037 | F        | heme binding                                            | 46                   | 664              |
| GO:0046906 | F        | tetrapyrrole binding                                    | 46                   | 665              |
| GO:0016491 | F        | oxidoreductase activity                                 | 77                   | 2115             |
| GO:0009055 | F        | electron carrier activity                               | 49                   | 1046             |
| GO:0030291 | F        | protein serine/threonine kinase inhibitor activity      | 5                    | 7                |
| GO:0004860 | F        | protein kinase inhibitor activity                       | 5                    | 7                |
| GO:0004861 | F        | cyclin-dependent protein kinase inhibitor activity      | 5                    | 7                |
| GO:0019210 | F        | kinase inhibitor activity                               | 5                    | 7                |
| GO:0016538 | F        | cyclin-dependent protein kinase regulator activity      | 5                    | 10               |
| GO:0019887 | F        | protein kinase regulator activity                       | 5                    | 12               |
| GO:0019207 | F        | kinase regulator activity                               | 5                    | 12               |
| GO:0005576 | C        | extracellular region                                    | 22                   | 458              |
| GO:0031224 | C        | intrinsic to membrane                                   | 48                   | 1591             |
| GO:0016021 | C        | integral to membrane                                    | 48                   | 1574             |
| GO:0044425 | C        | membrane part                                           | 50                   | 1975             |

<sup>a</sup> SEA was performed with agriGO (<http://bioinfo.cau.edu.cn/agriGO/analysis.php>) comparing the differentially expressed genes to all expressed genes. GO terms were declared enriched when FDR  $\leq 0.01$ . Differentially expressed genes were compared between local high nitrate and homogeneous low nitrate at 24 h treatments (513 of 582 differentially expressed genes were annotated).

**Supplemental Table 2.** Determination of overrepresented and underrepresented functional classes among differentially expressed genes ( $F_c \geq 2$ ;  $FDR \leq 5\%$ ) that were functionally annotated by MapMan. Fold changes (local HN vs homo LN) are given as logarithmic ( $\log_2$ ) values. Homogeneous low nitrate: homo LN; local high nitrate: local HN.

| Bin <sup>a</sup> | Functional group                          | Expressed genes <sup>b</sup> | Differentially expressed genes <sup>c</sup> | Representation <sup>d</sup> | p-value |
|------------------|-------------------------------------------|------------------------------|---------------------------------------------|-----------------------------|---------|
| 1                | Photosynthesis                            | 157                          | 5                                           |                             |         |
| 2                | Major CHO metabolism                      | 119                          | 3                                           |                             |         |
| 3                | Minor CHO metabolism                      | 139                          | 5                                           |                             |         |
| 4                | Glycolysis                                | 90                           | 1                                           |                             |         |
| 5                | Fermentation                              | 20                           | 4                                           |                             |         |
| 6                | Gluconeogenesis/ glyoxylate cycle         | 12                           | 1                                           |                             |         |
| 7                | OPP                                       | 33                           | 3                                           |                             |         |
| 8                | TCA / org. transformation                 | 74                           |                                             |                             |         |
| 9                | Mitochondrial e-transport / ATP synthesis | 126                          |                                             |                             |         |
| 10               | Cell wall                                 | 327                          | 21                                          |                             |         |
| 11               | Lipid metabolism                          | 376                          | 13                                          | +                           | 0.0102  |
| 12               | N-metabolism                              | 41                           | 7                                           |                             |         |
| 13               | Amino acid metabolism                     | 317                          | 11                                          | +                           | 0.0192  |
| 14               | S-assimilation                            | 10                           | 5                                           |                             |         |
| 15               | Metal handling                            | 63                           | 4                                           |                             |         |
| 16               | Secondary metabolism                      | 300                          | 13                                          |                             |         |
| 17               | Hormone metabolism                        | 417                          | 21                                          |                             |         |
| 18               | Co-factor and vitamine met.               | 73                           | 1                                           |                             |         |
| 19               | Tetrapyrrole synthesis                    | 49                           | 2                                           |                             |         |

| Bin <sup>a</sup> | Functional group              | Expressed genes <sup>b</sup> | Differentially expressed genes <sup>c</sup> | Representation <sup>d</sup> | p-value |
|------------------|-------------------------------|------------------------------|---------------------------------------------|-----------------------------|---------|
| 20               | Stress                        | 734                          | 32                                          | +                           | 0.0082  |
| 21               | Redox regulation              | 214                          | 10                                          |                             |         |
| 22               | Polyamine metabolism          | 15                           |                                             |                             |         |
| 23               | Nucleotide metabolism         | 176                          | 1                                           |                             |         |
| 24               | Biodegradation of Xenobiotics | 30                           | 1                                           |                             |         |
| 25               | C1-metabolism                 | 25                           |                                             |                             |         |
| 26               | Miscellaneous                 | 1043                         | 60                                          |                             |         |
| 27               | RNA                           | 3071                         | 50                                          | -                           | <0.0001 |
| 28               | DNA                           | 526                          | 2                                           |                             |         |
| 29               | Protein                       | 3551                         | 93                                          | +                           | <0.0001 |
| 30               | Signalling                    | 1235                         | 20                                          | -                           | <0.0001 |
| 31               | Cell                          | 870                          | 31                                          | +                           | 0.0001  |
| 32               | MicroRNA, natural antisense   | 1                            |                                             |                             |         |
| 33               | Development                   | 526                          | 5                                           |                             |         |
| 34               | Transport                     | 1023                         | 46                                          | +                           | 0.0028  |
| 35               | Not assigned                  | 9281                         | 151                                         | -                           | <0.0001 |
|                  | <b>MapMan Sum</b>             | <b>25064</b>                 | <b>622</b>                                  |                             |         |
|                  | <b>Expressed DEG Sum</b>      | <b>22796</b>                 | <b>582</b>                                  |                             |         |

<sup>a</sup> Each Bin consists of genes of similar biological function.

<sup>b</sup> All genes expressed in shoot-borne root treated by local high nitrate or homogeneous low nitrate.

<sup>c</sup> Subset of expressed genes that are differentially expressed between local high nitrate and homogeneous low nitrate treatment ( $F_c \geq 2$ ;  $FDR \leq 5\%$ ).

<sup>d</sup> Over (+) or underrepresentation (-) of differentially expressed genes in functional groups relative to the distribution of all expressed genes.

**Supplemental Table 3.** Gene list of the ubiquitin-dependent protein degradation pathway extracted from bin29 of the MapMan analysis.

| BinCode       | BinName                                       | Gene ID          | Description                                                                    | log <sub>2</sub> Fc |
|---------------|-----------------------------------------------|------------------|--------------------------------------------------------------------------------|---------------------|
| 29.5.11.4.2   | protein.degradation.ubiquitin.E3.RING         | GRMZM2G021796    | E3 ubiquitin-protein ligase EL5                                                | 1.75                |
| 29.5.11.4.2   | protein.degradation.ubiquitin.E3.RING         | GRMZM2G025255    | zinc finger (C3HC4-type RING finger) family protein                            | 2.84                |
| 29.5.11.4.2   | protein.degradation.ubiquitin.E3.RING         | GRMZM2G027375    | armadillo/beta-catenin repeat family protein / U-box domain-containing protein | 1.12                |
| 29.5.11.4.2   | protein.degradation.ubiquitin.E3.RING         | GRMZM2G045286    | zinc finger (C3HC4-type RING finger) family protein                            | 1.84                |
| 29.5.11.4.2   | protein.degradation.ubiquitin.E3.RING         | GRMZM2G052344    | zinc finger (C3HC4-type RING finger) family protein                            | 1.64                |
| 29.5.11.4.2   | protein.degradation.ubiquitin.E3.RING         | GRMZM2G075782    | zinc finger (C3HC4-type RING finger) family protein                            | 2.26                |
| 29.5.11.4.2   | protein.degradation.ubiquitin.E3.RING         | GRMZM2G100090    | armadillo/beta-catenin repeat family protein / U-box domain-containing protein | 1.1                 |
| 29.5.11.4.2   | protein.degradation.ubiquitin.E3.RING         | GRMZM2G115988    | protein protein binding protein                                                | -1.25               |
| 29.5.11.4.2   | protein.degradation.ubiquitin.E3.RING         | GRMZM2G137440    | zinc finger (C3HC4-type RING finger) family protein                            | 5.4                 |
| 29.5.11.4.2   | protein.degradation.ubiquitin.E3.RING         | GRMZM2G144782    | zinc finger (C3HC4-type RING finger) family protein                            | 1.66                |
| 29.5.11.4.2   | protein.degradation.ubiquitin.E3.RING         | GRMZM2G152461    | zinc finger (C3HC4-type RING finger) family protein                            | 4.01                |
| 29.5.11.4.2   | protein.degradation.ubiquitin.E3.RING         | GRMZM2G324111    | protein RING-H2 finger protein ATL5H precursor                                 | 4.17                |
| 29.5.11.4.2   | protein.degradation.ubiquitin.E3.RING         | GRMZM2G417089    | protein zinc finger, RING-type                                                 | 2.23                |
| 29.5.11.4.3.2 | protein.degradation.ubiquitin.E3.SCF.FB<br>OX | AC204641.5_FG001 | kelch repeat-containing F-box family protein                                   | 5.12                |
| 29.5.11.4.3.2 | protein.degradation.ubiquitin.E3.SCF.FB<br>OX | GRMZM2G004521    | kelch repeat-containing F-box family protein                                   | 3.14                |
| 29.5.11.4.3.2 | protein.degradation.ubiquitin.E3.SCF.FB<br>OX | GRMZM2G014022    | protein F-box domain containing protein                                        | 1.72                |
| 29.5.11.4.3.2 | protein.degradation.ubiquitin.E3.SCF.FB<br>OX | GRMZM2G025783    | kelch repeat-containing F-box family protein                                   | 1.51                |

| <b>BinCode</b> | <b>BinName</b>                                                           | <b>Gene ID</b> | <b>Description</b>                                                                     | <b>log<sub>2</sub>Fc</b> |
|----------------|--------------------------------------------------------------------------|----------------|----------------------------------------------------------------------------------------|--------------------------|
| 29.5.11.4.3.2  | <b>protein.degradation.<br/>ubiquitin.E3.SCF.FB<br/>OX</b>               | GRMZM2G100121  | FBL17; ubiquitin-protein ligase                                                        | 2.33                     |
| 29.5.11.4.3.2  | <b>protein.degradation.<br/>ubiquitin.E3.SCF.FB<br/>OX</b>               | GRMZM2G110057  | protein F-box protein interaction domain containing protein                            | 3.07                     |
| 29.5.11.4.3.2  | <b>protein.degradation.<br/>ubiquitin.E3.SCF.FB<br/>OX</b>               | GRMZM2G138176  | SKP2B; F-box domain, cyclin-like; protein F-box/ Leucine-rich repeat protein           | 4.27                     |
| 29.5.11.4.3.2  | <b>protein.degradation.<br/>ubiquitin.E3.SCF.FB<br/>OX</b>               | GRMZM2G171616  | FBL6   EBF1 (EIN3-BINDING F BOX PROTEIN 1); protein binding / ubiquitin-protein ligase | 2.29                     |
| 29.5.11.4.3.2  | <b>protein.degradation.<br/>ubiquitin.E3.SCF.FB<br/>OX</b>               | GRMZM2G325650  | kelch repeat-containing F-box family protein                                           | 2.27                     |
| 29.5.11.4.3.3  | <b>protein.degradation.<br/>ubiquitin.E3.SCF.cullin</b>                  | GRMZM2G551108  | ubiquitin-protein ligase                                                               | 1.18                     |
| 29.5.11.4.5.2  | <b>protein.degradation.<br/>ubiquitin.E3.BTB/POZ<br/>Cullin3.BTB/POZ</b> | GRMZM2G428119  | ATBPM4 (BTB-POZ and MATH domain 4); protein binding                                    | 1.64                     |
| 29.5.11.5      | <b>protein.degradation.<br/>ubiquitin.ubiquitin<br/>protease</b>         | GRMZM2G038126  | protein 26S protease regulatory subunit 6B                                             | 1.62                     |

**Supplemental Table 4.** Gene list of cell cycle related genes extracted from bin31 of the MapMan analysis.

| BinCode | BinName       | Gene ID       | Description                                                                       | log <sub>2</sub> Fc |
|---------|---------------|---------------|-----------------------------------------------------------------------------------|---------------------|
| 31.2    | cell.division | GRMZM2G068193 | CDKB2;1 (cyclin-dependent kinase B2;1)                                            | 1.45                |
| 31.2    | cell.division | GRMZM2G070115 | CDKB2;2 (cyclin-dependent kinase B2;2)                                            | 2.55                |
| 31.2    | cell.division | GRMZM2G495626 | CDKB1;1 (cyclin-dependent kinase B 1;1)                                           | 3.83                |
| 31.3    | cell.cycle    | GRMZM2G005619 | CYCB1;3 (cyclin-dependent protein kinase regulator), G2/mitotic-specific cyclin 1 | 5.07                |
| 31.3    | cell.cycle    | GRMZM2G025200 | CYCB1;2 (cyclin-dependent protein kinase regulator), G2/mitotic-specific cyclin 1 | 1.14                |
| 31.3    | cell.cycle    | GRMZM2G034647 | CYCB1;2 (cyclin-dependent protein kinase regulator), G2/mitotic-specific cyclin 1 | 3.59                |
| 31.3    | cell.cycle    | GRMZM2G062453 | CYCB1;4 (cyclin-dependent protein kinase regulator), G2/mitotic-specific cyclin 1 | 1.53                |
| 31.3    | cell.cycle    | GRMZM2G073003 | CYCB1;6 (cyclin-dependent protein kinase regulator), G2/mitotic-specific cyclin 1 | 5.1                 |
| 31.3    | cell.cycle    | GRMZM2G073671 | CYCB2;1 (cyclin-dependent protein kinase regulator), G2/mitotic-specific cyclin 2 | 1.73                |
| 31.3    | cell.cycle    | GRMZM2G138886 | CYCB2;2 (cyclin-dependent protein kinase regulator), G2/mitotic-specific cyclin 2 | 3.97                |
| 31.3    | cell.cycle    | GRMZM2G310115 | CYCB1;1 (cyclin-dependent protein kinase regulator), G2/mitotic-specific cyclin 1 | 3.25                |
| 31.3    | cell.cycle    | GRMZM2G037926 | KRP4, ICK6   cyclin-dependent protein kinase inhibitor                            | -1.14               |
| 31.3    | cell.cycle    | GRMZM2G084570 | KRP2; cyclin-dependent protein kinase inhibitor                                   | -1.8                |
| 31.3    | cell.cycle    | GRMZM2G101613 | cyclin-dependent protein kinase inhibitor                                         | -1.45               |
| 31.3    | cell.cycle    | GRMZM2G116885 | KRP3, ICK6   cyclin-dependent protein kinase inhibitor                            | -2.94               |
| 31.3    | cell.cycle    | GRMZM2G157510 | KRP3, ICK6   cyclin-dependent protein kinase inhibitor                            | -4.16               |
| 31.3    | cell.cycle    | GRMZM5G854731 | KRP1; cyclin-dependent protein kinase inhibitor                                   | -2.2                |

**Supplemental Table 5** Internal standards used in the IAA detection by UPLC-ESI-MS/MS analysis.

| Name                                                 | Abbreviation | Molecular mass | Ionization mode | Quantification ion | First target ion | Second target ion |
|------------------------------------------------------|--------------|----------------|-----------------|--------------------|------------------|-------------------|
| Indole-3-acetonitrile                                | IAN          | 156.2          | ESI+            | 89.9               | 117.0            | 130.0             |
| Indole-3-acetamide                                   | IAM          | 174.2          | ESI+            | 77.0               | 103.0            | 130.4             |
| Indole-3-acetic acid                                 | IAA          | 175.2          | ESI+            | 77.0               | 103.0            | 130.5             |
| [ <sup>2</sup> H <sub>5</sub> ] Indole-3-acetic acid | D-IAA        | 180.2          | ESI+            | 106.3              | 180.2            | -                 |
| Indole-3-acetic acid methylester                     | IAAMe        | 189.2          | ESI+            | 76.9               | 103.0            | 130.0             |
| Indole-3-acetic acid ethylester                      | IAAEt        | 203.2          | ESI+            | 77.0               | 103.0            | 130.0             |
| Indole-3-L-alanine                                   | IAAla        | 247.0          | ESI+            | 89.9               | 103.0            | 130.0             |
| Indole-3-L-isoleucin                                 | IAiLeu       | 288.4          | ESI+            | 86.0               | 103.0            | 130.0             |
| Indole-3-L-tryptophan                                | IATrp        | 361.4          | ESI+            | 130.0              | 188.1            | 205.1             |
| Indole-3-L-glutamic acid                             | IAGlu        | 304.3          | ESI+            | 103.0              | 130.0            | 147.9             |
| 2-oxindole-3-acetic acid                             | OxIAA        | 191.2          | ESI+            | 128.0              | 132.0            | 146.0             |

**Supplemental Text 1** Detailed procedure of MS data processing using TargetLynx V4.1 SCN 904.

The column temperature was set to 40 °C and the autosampler was set to 4 °C. The mobile phases were H<sub>2</sub>O containing 0.1 % FA (A), MeOH containing 0.1 % FA. The mobile phase flow was 0.4 ml min<sup>-1</sup>. The gradient conditions were as follows: A, 90 % in 0 – 0.3 min; 90 – 80 % in 0.3 – 0.7 min; 80 – 40 % in 0.7 – 8 min; 40 – 1 % in 8 – 8.5 min; 1 % in 8.5 – 8.9 min; 1 – 90 % in 8.9 – 9.0 min; 90 % in 9.0 – 10.0 min.

The Xevo TQ MS operated in both ESI+ and ESI- ion mode. The electrospray capillary voltage was 2.45 kV with a cone voltage of 20 V. The cone and desolvation gas flows were set to 20 and 1000 L h<sup>-1</sup>. The cone and desolvation gas flows were set to 50 and 1000 L h<sup>-1</sup>. The source and desolvation temperature were 150 and 650 °C. The collision energy of the MS-MS was between 10 and 50 eV. For the quantification of the analytes we used three fragment ions one for quantification two for qualification and for the internal standards two fragment ions were used (Tab. S1). MS data processing was done by using TargetLynx V4.1 SCN 904.
